# Supplementary material
Source: Research Square preprint supplement (doi:10.21203/rs.3.rs-9514991/v1)
Supplement: Supplementary file 1 [file b76682edbd706a2c55939c75.pdf]

## Genetic insights into drought responses of boreal Scots pine

European Journal of Forest Research

Alper Tuna Kavlak<sup>1\*</sup>, Harri Mäkinen<sup>1</sup>, Olli-Pekka Tikkasalo<sup>1</sup>, Hanni Kärkkäinen<sup>3,4</sup>, Matti Haapanen<sup>1</sup>, Katri Kärkkäinen<sup>2</sup>, Sonja Kujala<sup>2</sup>

<sup>1</sup>Natural Resources Institute Finland (Luke), Latokartanonkaari 9, 00790 Helsinki, Finland

<sup>2</sup>Natural Resources Institute Finland (Luke), Paavo Havaksen tie 3, 90570 Oulu, Finland

<sup>3</sup>Natural Resources Institute Finland (Luke), 31600 Jokioinen, Finland

<sup>4</sup>Boreal Kasvinjalostus Oy, Myllytie 10, 31600 Jokioinen, Finland

\*Corresponding author: Alper Tuna Kavlak

Email: alper.kavlak@luke.fi

### SUPPLEMENTARY MATERIALS

#### S1. Detailed genomic mixed-model specifications

For Tuusula, the model for observation  $i = 1, \dots, n_{Tuusula}$  was

$$y_i = \mu + \sum_{j=2}^J \mathbf{1}\{Block_i = j\} \beta_j^{Block} + u_i + \varepsilon_i,$$

where Block is a fixed effect and J is the number of Block levels (first level is the reference).

For Hankasalmi (two trials combined), the model for observation  $i = 1, \dots, n_{Hankasalmi}$  was

$$y_i = \mu + \sum_{k=2}^K \mathbf{1}\{Trial_i = k\} T_k + \sum_{k=1}^K \sum_{j=2}^{J_k} \mathbf{1}\{Trial_i = k, Block_i = j\} \gamma_{j(k)}^{Block(Trial)} + u_i + \varepsilon_i,$$

where Trial + Block nested within Trial are the fixed effects. Random terms for both sites were

$$\mathbf{u} \sim N(\mathbf{0}, \mathbf{G}\sigma_A^2), \varepsilon \sim N(\mathbf{0}, \mathbf{I}\sigma_E^2)$$

Here,  $\mu$  is the intercept;  $\beta_j^{Block}$  are fixed block effects;  $T_k$  are fixed trial effects;  $\gamma_{j(k)}^{Block(Trial)}$

are fixed block effects nested within trial  $k$ ;  $u_i$  is the random additive genetic effect for tree  $i$ ;

and  $\varepsilon_i$  is the residual error. The indicator function  $1\{\cdot\}$  equals 1 when the condition in braces is

true and 0 otherwise.

**Table S1.**

**Pearson correlations between SPEI variables and annual basal area increment (BAI)**

Results shown separately for the Tuusula (mesic) and Hankasalmi (sub-xeric) sites. SPEI values are ordered by correlation strength within each site.

| Tuusula (mesic) |           |              | Hankasalmi (sub-xeric) |           |              |
|-----------------|-----------|--------------|------------------------|-----------|--------------|
| SPEI            | Month     | r (BAI)      | SPEI                   | Month     | r (BAI)      |
| SPEI-01         | June      | <b>0.736</b> | SPEI-01                | June      | <b>0.826</b> |
| SPEI-02         | July      | 0.630        | SPEI-12                | June      | 0.708        |
| SPEI-04         | September | 0.485        | SPEI-12                | July      | 0.642        |
| SPEI-03         | August    | 0.453        | SPEI-04                | July      | 0.618        |
| SPEI-01         | July      | 0.416        | SPEI-24                | July      | 0.568        |
| SPEI-04         | July      | 0.206        | SPEI-12                | May       | 0.551        |
| SPEI-03         | July      | 0.179        | SPEI-02                | July      | 0.539        |
| SPEI-03         | September | 0.168        | SPEI-06                | September | 0.490        |
| SPEI-01         | September | 0.142        | SPEI-12                | September | 0.485        |

| Tuusula (mesic) |           |        | Hankasalmi (sub-xeric) |           |        |
|-----------------|-----------|--------|------------------------|-----------|--------|
| SPEI-02         | August    | 0.132  | SPEI-24                | September | 0.480  |
| SPEI-06         | September | 0.117  | SPEI-24                | June      | 0.455  |
| SPEI-04         | August    | 0.043  | SPEI-03                | August    | 0.426  |
| SPEI-03         | June      | -0.027 | SPEI-04                | September | 0.400  |
| SPEI-06         | July      | -0.084 | SPEI-24                | August    | 0.397  |
| SPEI-12         | September | -0.102 | SPEI-12                | August    | 0.355  |
| SPEI-02         | June      | -0.111 | SPEI-24                | May       | 0.337  |
| SPEI-12         | August    | -0.117 | SPEI-01                | July      | 0.321  |
| SPEI-02         | September | -0.123 | SPEI-06                | July      | 0.320  |
| SPEI-01         | August    | -0.156 | SPEI-03                | June      | 0.238  |
| SPEI-06         | August    | -0.166 | SPEI-03                | July      | 0.207  |
| SPEI-12         | July      | -0.177 | SPEI-06                | August    | 0.201  |
| SPEI-06         | June      | -0.317 | SPEI-02                | August    | 0.171  |
| SPEI-12         | June      | -0.324 | SPEI-03                | September | 0.132  |
| SPEI-12         | May       | -0.392 | SPEI-04                | August    | 0.112  |
| SPEI-04         | June      | -0.443 | SPEI-06                | June      | 0.089  |
| SPEI-24         | September | -0.603 | SPEI-04                | June      | 0.031  |
| SPEI-24         | August    | -0.642 | SPEI-02                | May       | -0.076 |
| SPEI-24         | July      | -0.706 | SPEI-01                | August    | -0.125 |

| Tuusula (mesic) |      |        | Hankasalmi (sub-xeric) |           |        |
|-----------------|------|--------|------------------------|-----------|--------|
| SPEI-04         | May  | -0.748 | SPEI-02                | June      | -0.130 |
| SPEI-06         | May  | -0.763 | SPEI-01                | September | -0.170 |
| SPEI-02         | May  | -0.765 | SPEI-02                | September | -0.272 |
| SPEI-24         | May  | -0.818 | SPEI-03                | May       | -0.274 |
| SPEI-24         | June | -0.833 | SPEI-06                | May       | -0.340 |
| SPEI-01         | May  | -0.862 | SPEI-04                | May       | -0.419 |
| SPEI-03         | May  | -0.897 | SPEI-01                | May       | -0.593 |

**Table S2. Within-site Pearson and Spearman correlations between corresponding drought-response traits across the 2019 and 2021 drought events in Tuusula and Hankasalmi.**

| Site       | Trait | 2019 vs 2021 comparison | Pearson r     | Spearman $\rho$ |
|------------|-------|-------------------------|---------------|-----------------|
| Tuusula    | Rt    | Rt1 vs Rt2              | 0.032         | 0.046           |
| Tuusula    | Rc    | Rc1 vs Rc2              | 0.052         | 0.091           |
| Tuusula    | Rs    | Rs1 vs Rs2              | <b>-0.149</b> | -0.058          |
| Tuusula    | RRs   | RRs1 vs RRs2            | 0.011         | 0.060           |
| Tuusula    | D     | D1 vs D2                | <b>-0.131</b> | -0.074          |
| Hankasalmi | Rt    | Rt1 vs Rt2              | -0.007        | 0.002           |
| Hankasalmi | Rc    | Rc1 vs Rc2              | 0.016         | -0.024          |
| Hankasalmi | Rs    | Rs1 vs Rs2              | <b>-0.281</b> | <b>-0.287</b>   |
| Hankasalmi | RRs   | RRs1 vs RRs2            | -0.072        | <b>-0.107</b>   |

| Site       | Trait | 2019 vs 2021 comparison | Pearson r     | Spearman $\rho$ |
|------------|-------|-------------------------|---------------|-----------------|
| Hankasalmi | D     | D1 vs D2                | <b>-0.236</b> | <b>-0.279</b>   |

Rt: resistance; Rc: recovery; Rs: resilience; RRs: relative resilience; D: deviation from the full-resilience boundary. Subscripts 1 and 2 refer to the first (2019) and second (2021) drought events, respectively. Rt, Rc, Rs, RRs, and D are dimensionless. Pearson correlations describe linear associations between the corresponding drought-response traits across the 2019 and 2021 drought events, whereas Spearman correlations describe the stability of trait rankings across events. Correlations were calculated separately within each site. Bold values indicate significant correlations at  $p < 0.01$ .
